# Supplementary material
Source: publisher figshare collection journal article supplement (https://gsajournals.figshare.com/ndownloader/files/13878941)
Supplement: Supplementary file 1 [file 13878941]

**File S1 The virulence tests and statistical analysis method**

**Lactate dehydrogenase (LDH) assay**

The Madin-Darby bovine kidney (MDBK) cells were cultured in RPMI 1640 medium supplemented with 10% (v/v) fetal bovine serum (Gibco) in an incubator at 37°C with 5% CO2. LDH assay was conducted in 96-well plates as previously described (Liu *et al.* 2017). Briefly, about 2 × 104 MDBK cells were infected with 100 µl *M. dispar* GS01 at a multiplicity of infection (MOI) of 5, 50 and 500. After incubation, the cell supernatants were collected at 24 h post-infection, then centrifuged at 3, 200 × g for 2 min, and the 50 µl aliquot of the supernatant was use for measuring LDH release by commercial cytotoxicity assay kit (Promega) according to the manufacturer’s instructions.

**Biofilm formation analysis**

Scanning electron microscopy (SEM) was performed to observe *M. dispar* GS01 biofilm formation. The strain was grown 3 days in modified Friis medium and then diluted 1:10 in a 6 well microtitre plate containing 2 ml mycoplasma medium and placed glass coverslips and left at 37℃for 3 days without shaking. The biofilms were processed and visualized as previously described (Chen *et al.* 2018) with no modification. To quantify the biofilms generated by *M. dispar* GS01, crystal violet staining assay in a 96-well microtitre plates was conducted as previously described (Mcauliffe *et al.* 2006). Briefly, biofims were grown in 96-well microtitre plates, non-adherent cells were removed and biofilms were washed three times with PBS. After stained with 0.5% crystal violet for 30 min, biofilms were then washed five times with distilled water and dried at room temperature. 200 µl 95% ethanol was then added to solubilize crystal violet and was quantified by measuring OD570nm in a microtitre plates using a Bio-rad plate reader Model 680. The experiment was performed in triplicate.

**H2O2 production assay**

H2O2 production assay was conducted as previously described for *Mycoplasma mycoides* subsp. *capr*i (Pilo *et al.* 2005) with some modifications. Briefly, mid-logarithmic phased *M. dispar* GS01 were harvested by centrifugation at 13,400 g for 5 min at 4°C. After washing three times in incubation buffer (67.7 mM HEPES, pH 7.3, 140 mM NaCl, and 7 mM MgCl2). The cell pellets were resuspended in prewarmed incubation buffer to a density of 109 cells/ml, portioned in aliquots of 1 ml, and incubated at 37°C for 1 h. After incubation, a final concentration of 100 μM glycerol was added to mycoplasma suspensions to induce the H2O2 production. H2O2 production was measured over a 20 min time course using commercial H2O2 quantitative assay kit (Sangon Biotech, Shanghai, China) following the manufacturer’s instructions. The experiment was performed in triplicate.

**Statistical analysis**

Statistical analysis was accomplished by using SPSS 15.0 followed by Student's t test . The resulting values were expressed as mean and standard deviations (SD) and p < 0.05 was considered statistically significant.
